# Supplementary material for: Chronic fluoxetine treatment reduces parvalbumin expression and perineuronal nets in gamma-aminobutyric acidergic interneurons of the frontal cortex in adult mice
Source: PubMed Central journal article supplement (PMC4225860; doi:10.1186/1756-6606-6-43), 2013-11-05
Supplement: 1756-6606-6-43-S1.pdf [file 1756-6606-6-43-S1.pdf]

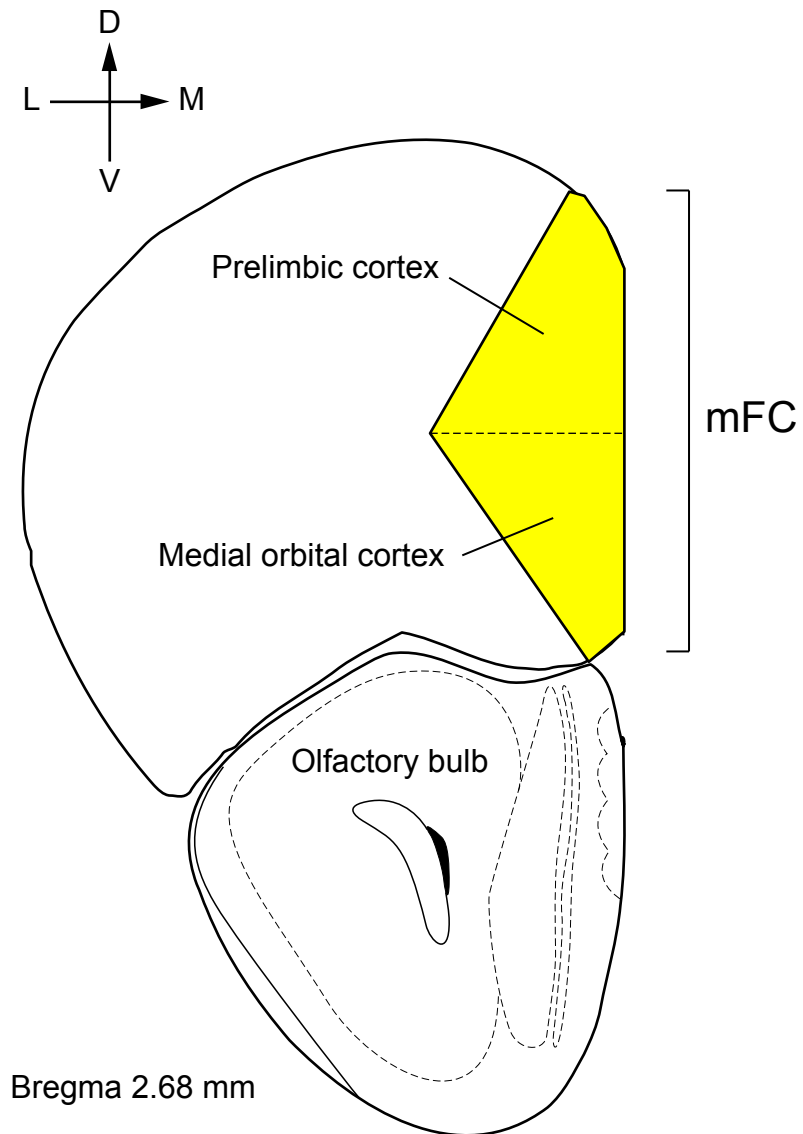

**Figure S1. Schematic drawing of coronal sections of the mFC**

The mFC (yellow), which we analyzed in this study, contains the prelimbic and medial orbital cortices. mFC, medial frontal cortex.

## A Basolateral amygdala

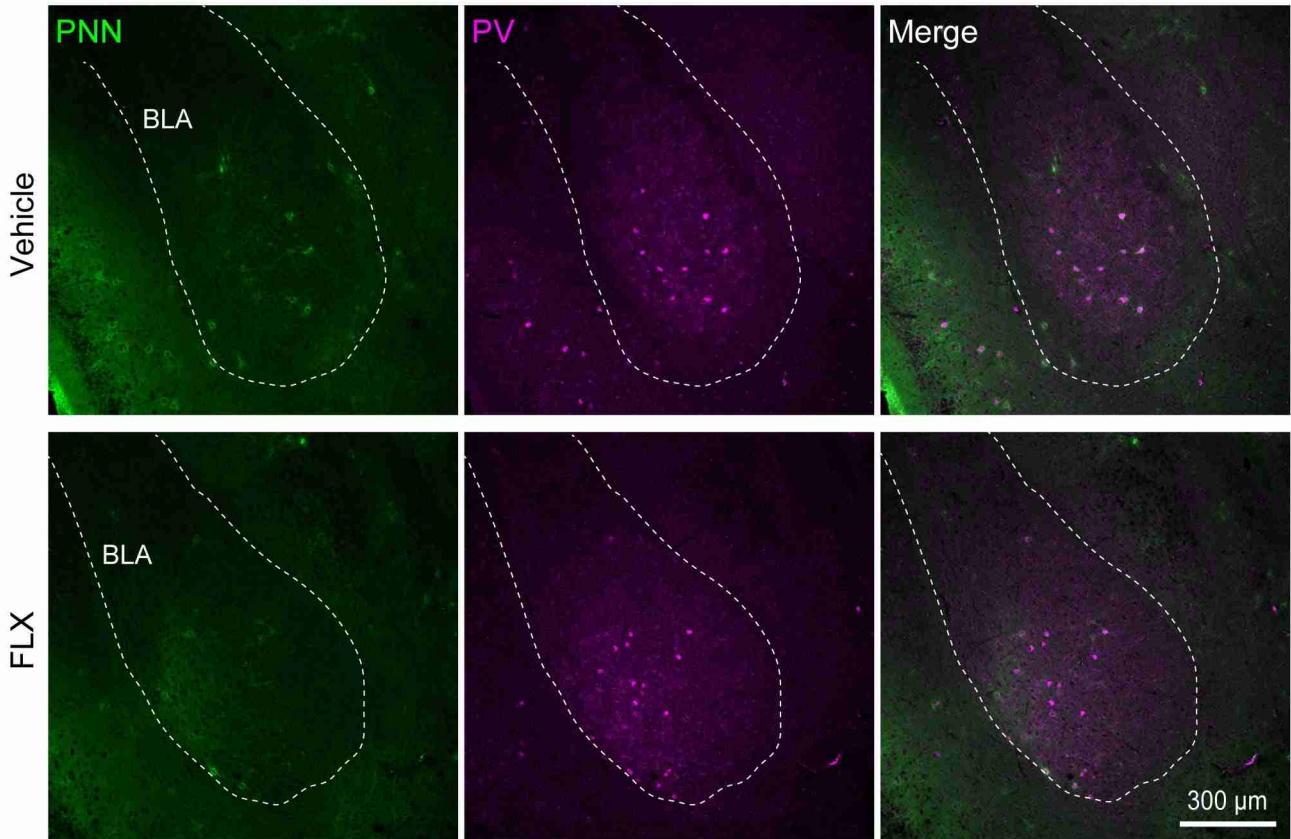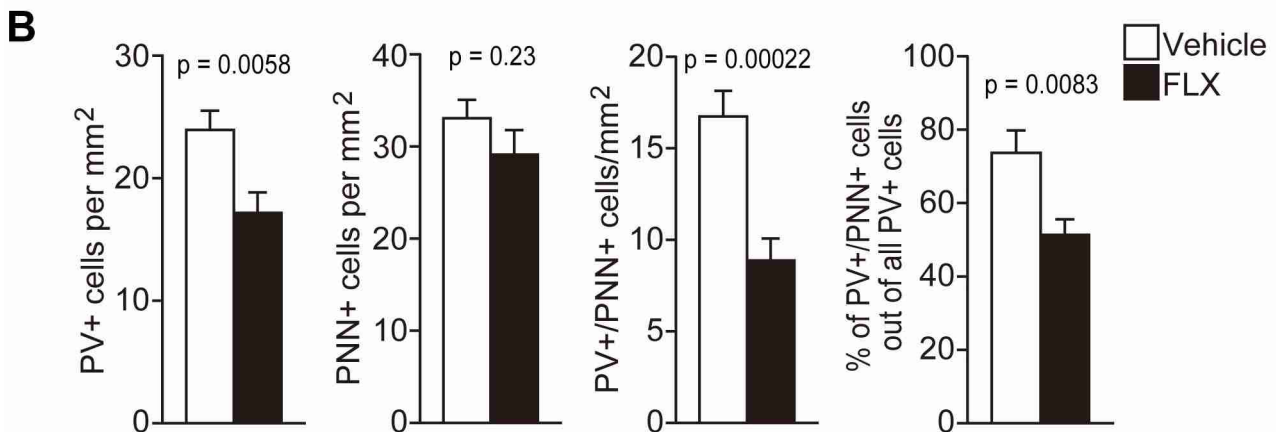

### Figure S2. Decrease in the number of parvalbumin+ cells in the basolateral amygdala

(A) Representative coronal images of parvalbumin+ (magenta)/PNN+ (green) cells in the basolateral amygdala of mice treated with vehicle (upper row) or FLX (lower row). Mice received FLX for 3 weeks at 15 mg/kg/day. (B) Quantification of the number of parvalbumin+, PNN+, parvalbumin+/PNN+ cells, and the proportion of parvalbumin+/PNN+ cells in the total number of parvalbumin+ cells (n = 4 mice each; 11-week-old). BLA, basolateral amygdala; FLX, fluoxetine; PNN, perineuronal net; PV, parvalbumin.

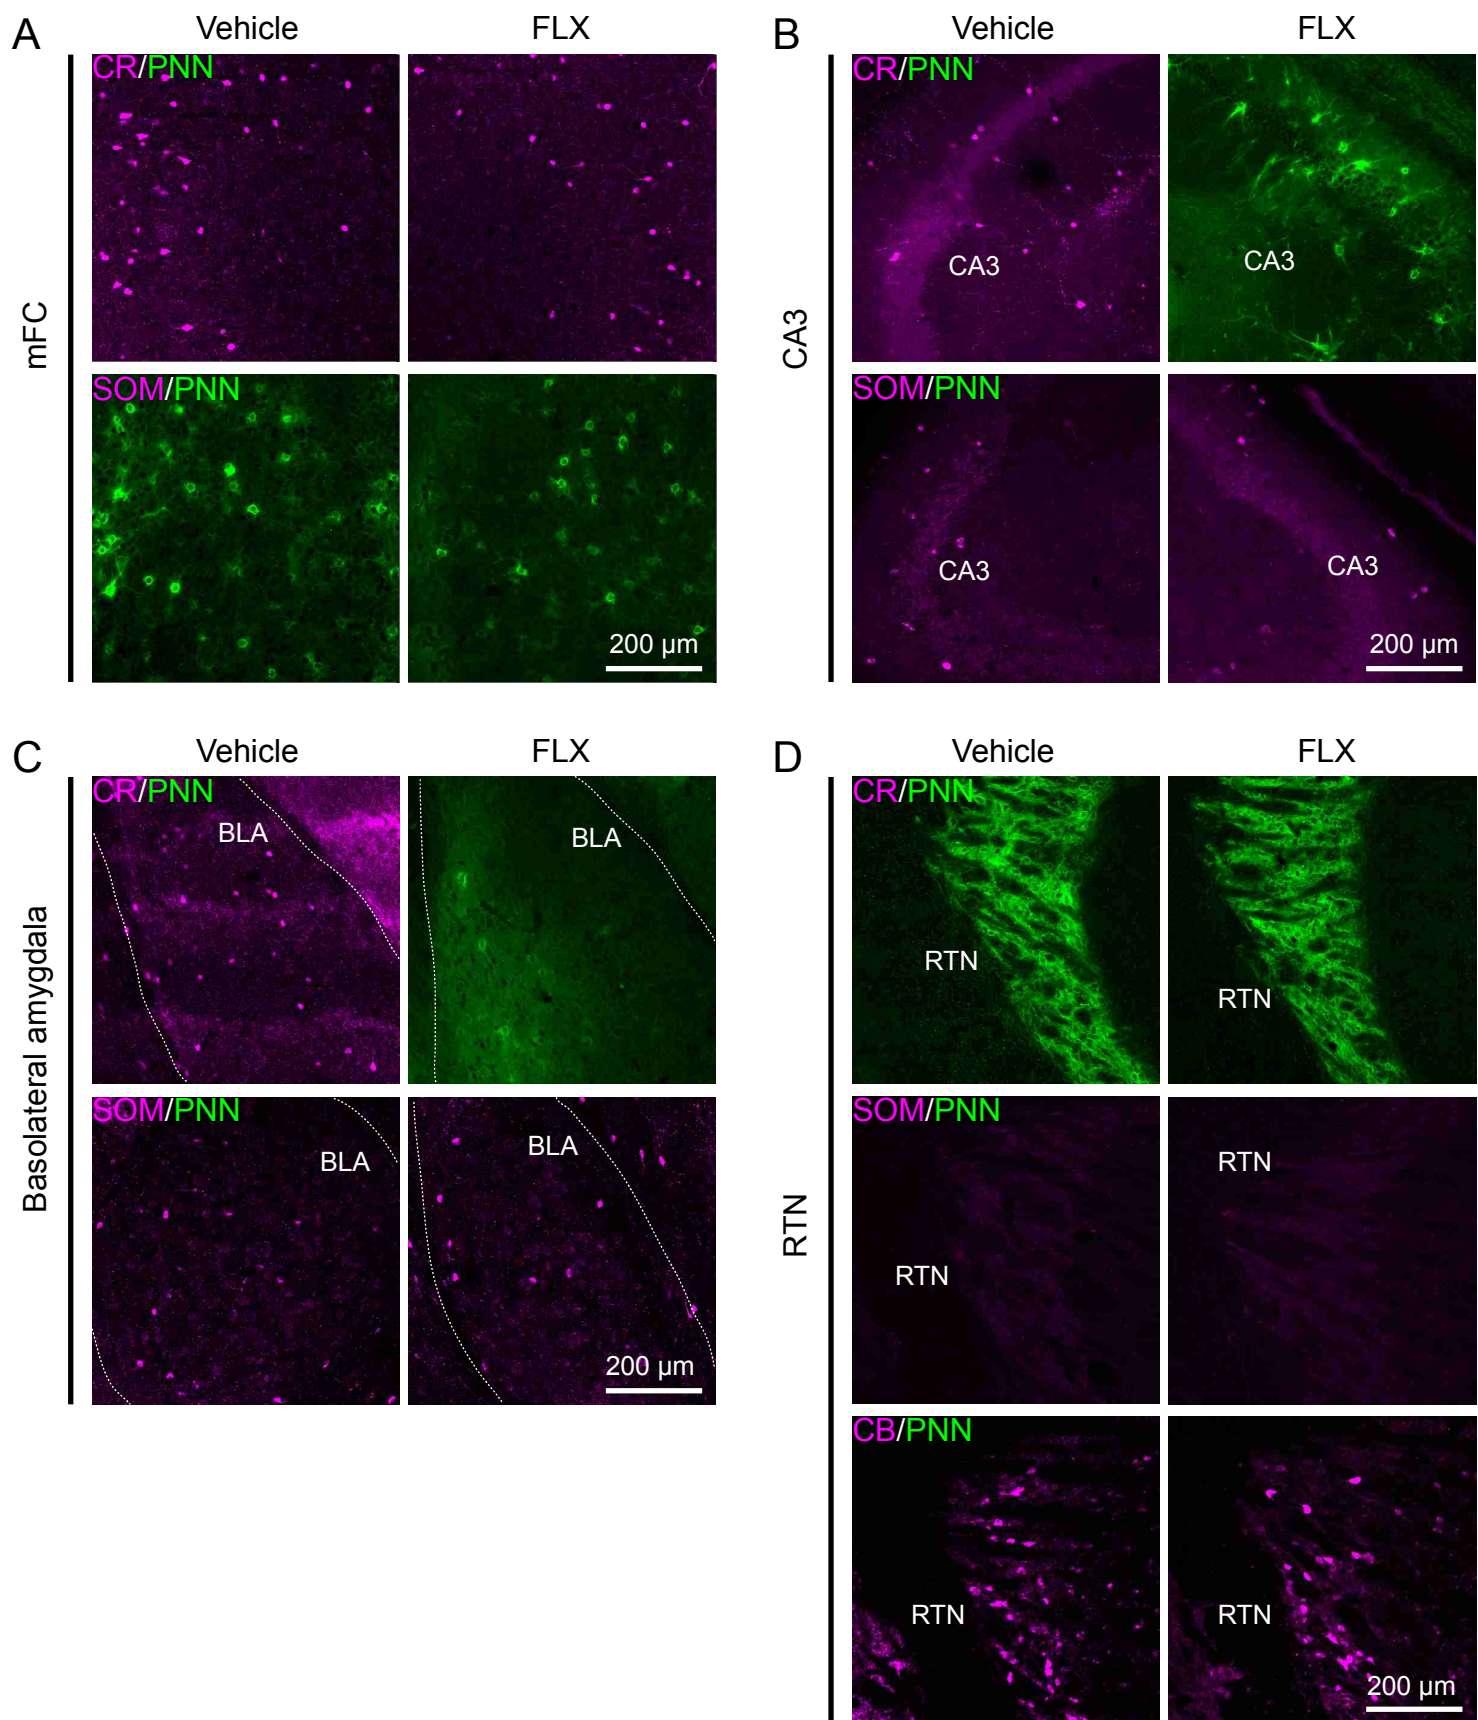

Figure S3

**Figure S3. Immunofluorescent staining of interneuron markers and PNN in the mFC, hippocampal CA3, basolateral amygdala, and RTN**

(A-D) Representative coronal images of double staining for interneuronal markers (magenta) and PNN (green) are shown. Mice received FLX for 3 weeks at 15 mg/kg/day (n = 4 mice each; 11-week-old). Note that calretinin and somatostatin are hardly detected in PNN+ cells in the mFC (A), hippocampal CA3 region (B), basolateral amygdala (C), and RTN (D).

BLA, basolateral amygdala; CA, cornu ammonis; CB, calbindin; CR, calretinin; FLX, fluoxetine; PNN, perineuronal net; PV, parvalbumin; RTN, reticular thalamic nucleus; SOM, somatostatin.

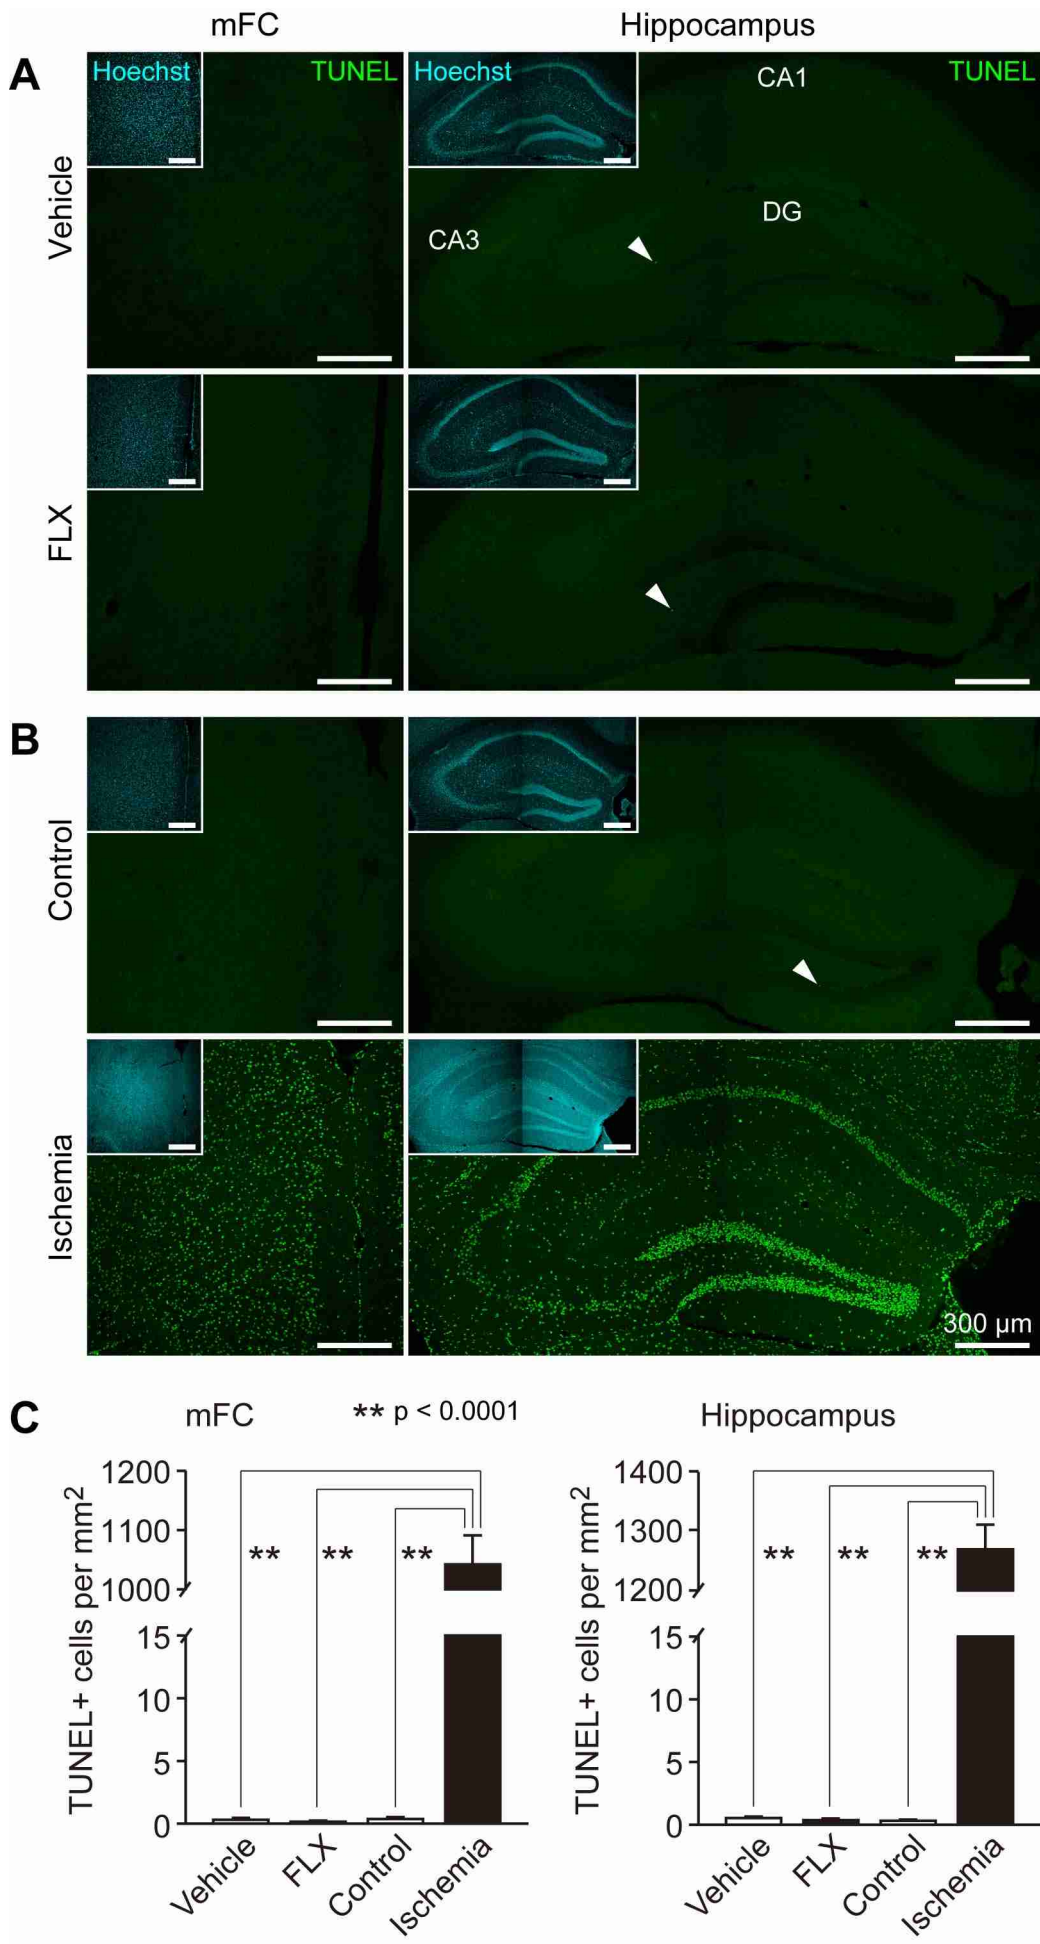

Figure S4



**Figure S4. FLX treatment did not alter the number of apoptotic cells in the mFC and hippocampus**

**(A)** Representative coronal images of TUNEL-stained mFC and hippocampal tissues in vehicle or FLX-treated mice. Mice received FLX for 3 weeks at 15 mg/kg/day.

**(B)** Representative images of TUNEL-stained mFC and hippocampal tissues in control or ischemia-treated mice. TUNEL+ cells are indicated by arrowhead (green).

**(C)** Quantification of the number of TUNEL+ cells in (A) and (B) (n = 4 mice each; 11-week-old). CA, cornu ammonis; DG, dentate gyrus; FLX, fluoxetine; mFC, medial frontal cortex; TUNEL, terminal deoxynucleotidyl transferase-mediated dUTP nick-end labeling.

**A** medial Frontal cortex

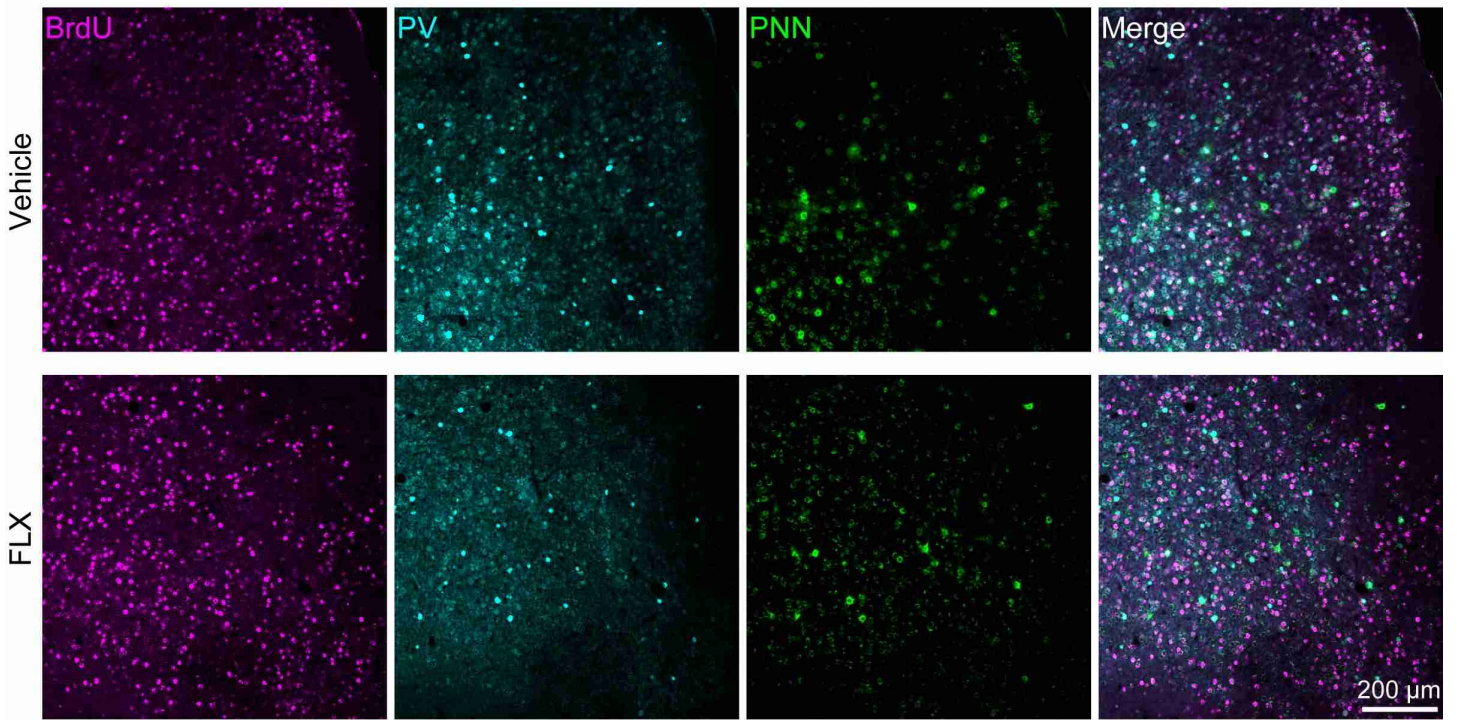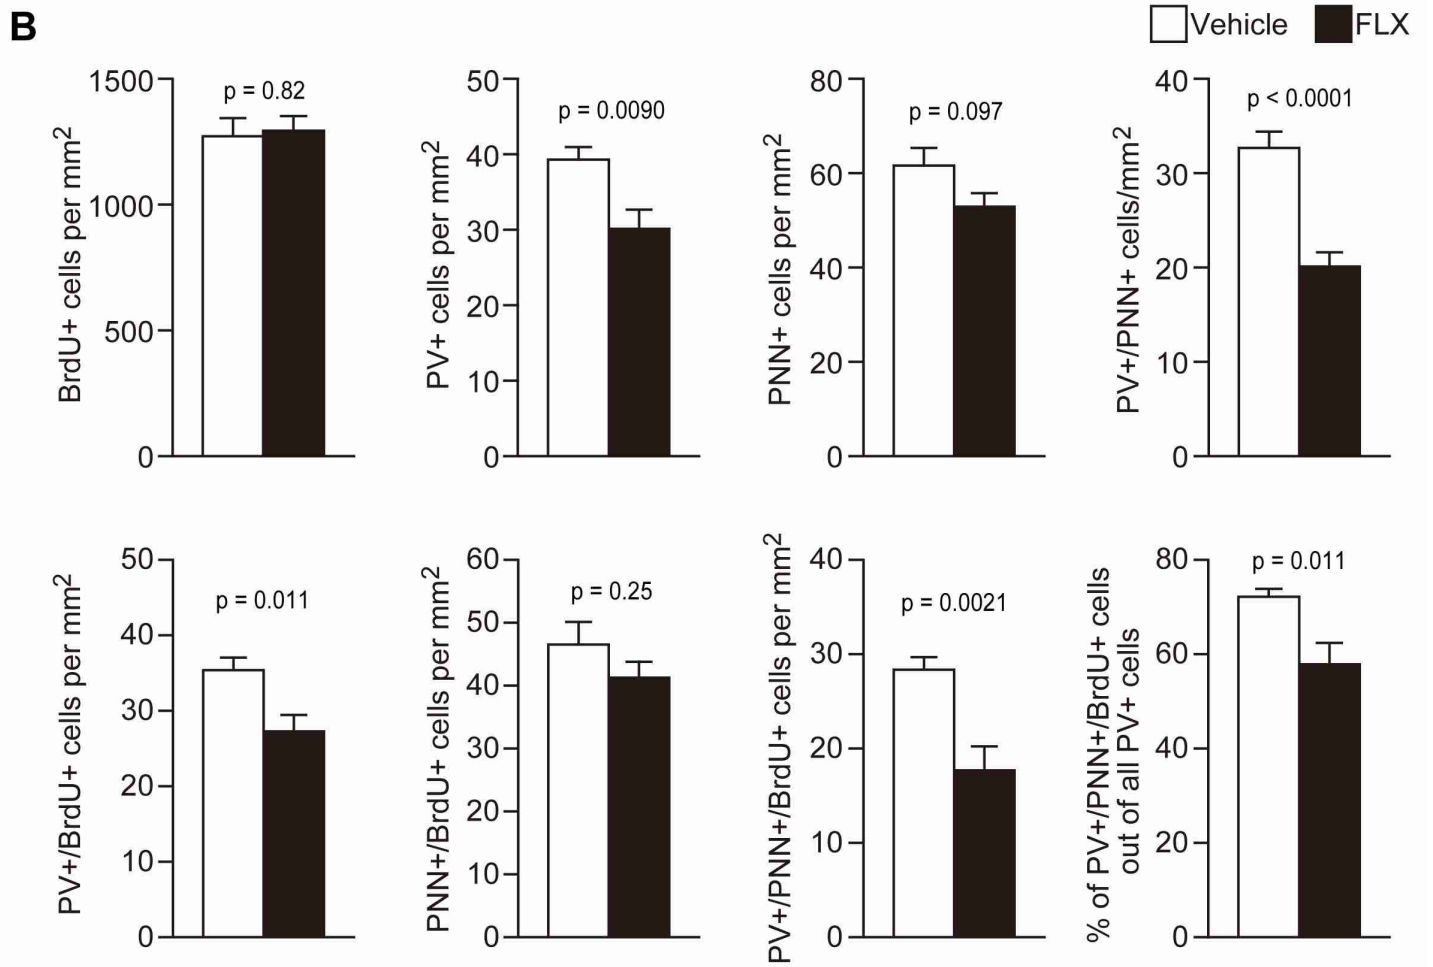

Figure S5

**Figure S5. No production of new parvalbumin+ cells with FLX treatments in the mFC**

**(A)** Representative coronal images of BrdU- (magenta), parvalbumin- (cyan), and PNN-stained (green) structures in the mFC. Mice received FLX for 3 weeks at 15 mg/kg/day.

**(B)** Quantification of the number of indicated marker-positive cells (n = 4 mice each; 11-week-old). BrdU, 5-bromodeoxyuridine; FLX, fluoxetine; PNN, perineuronal net; PV, parvalbumin.



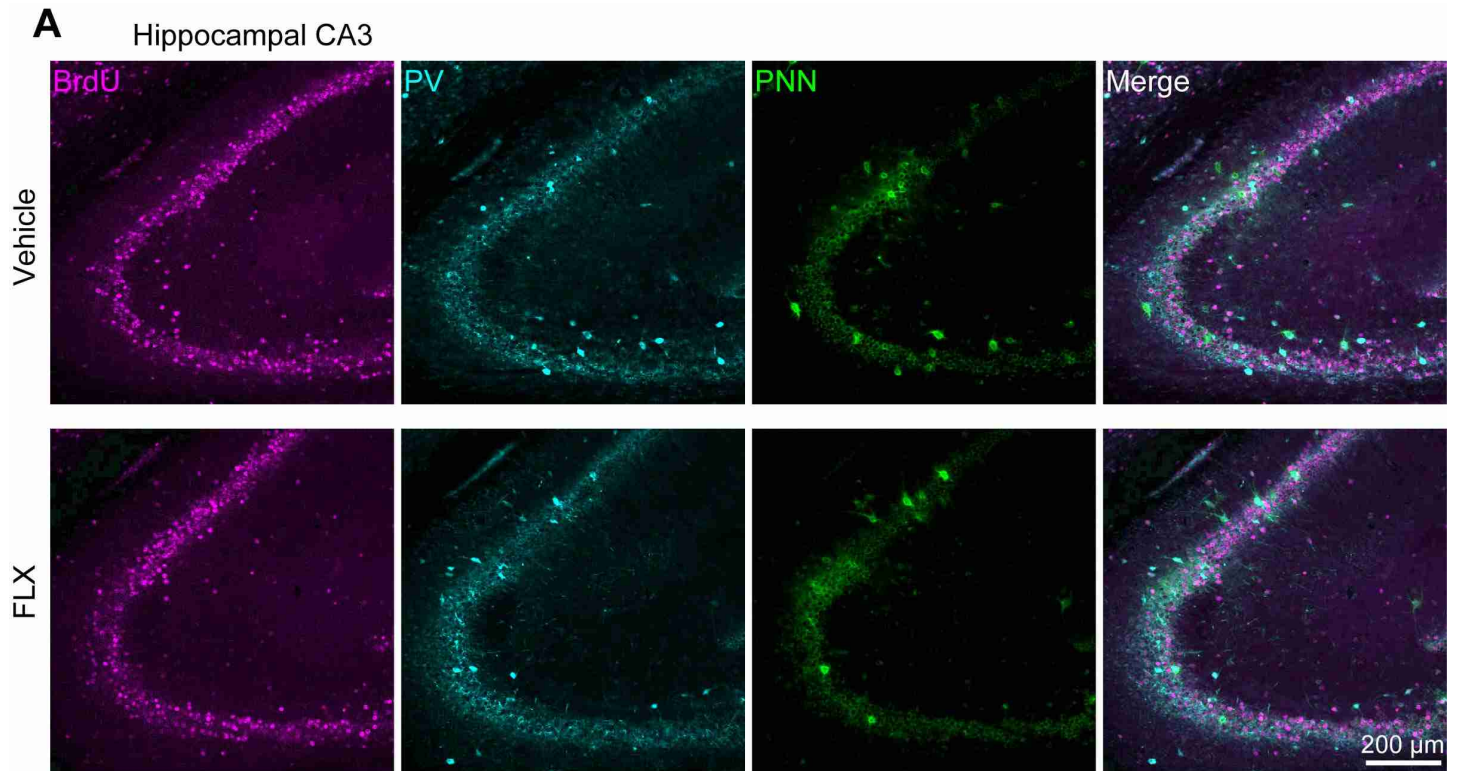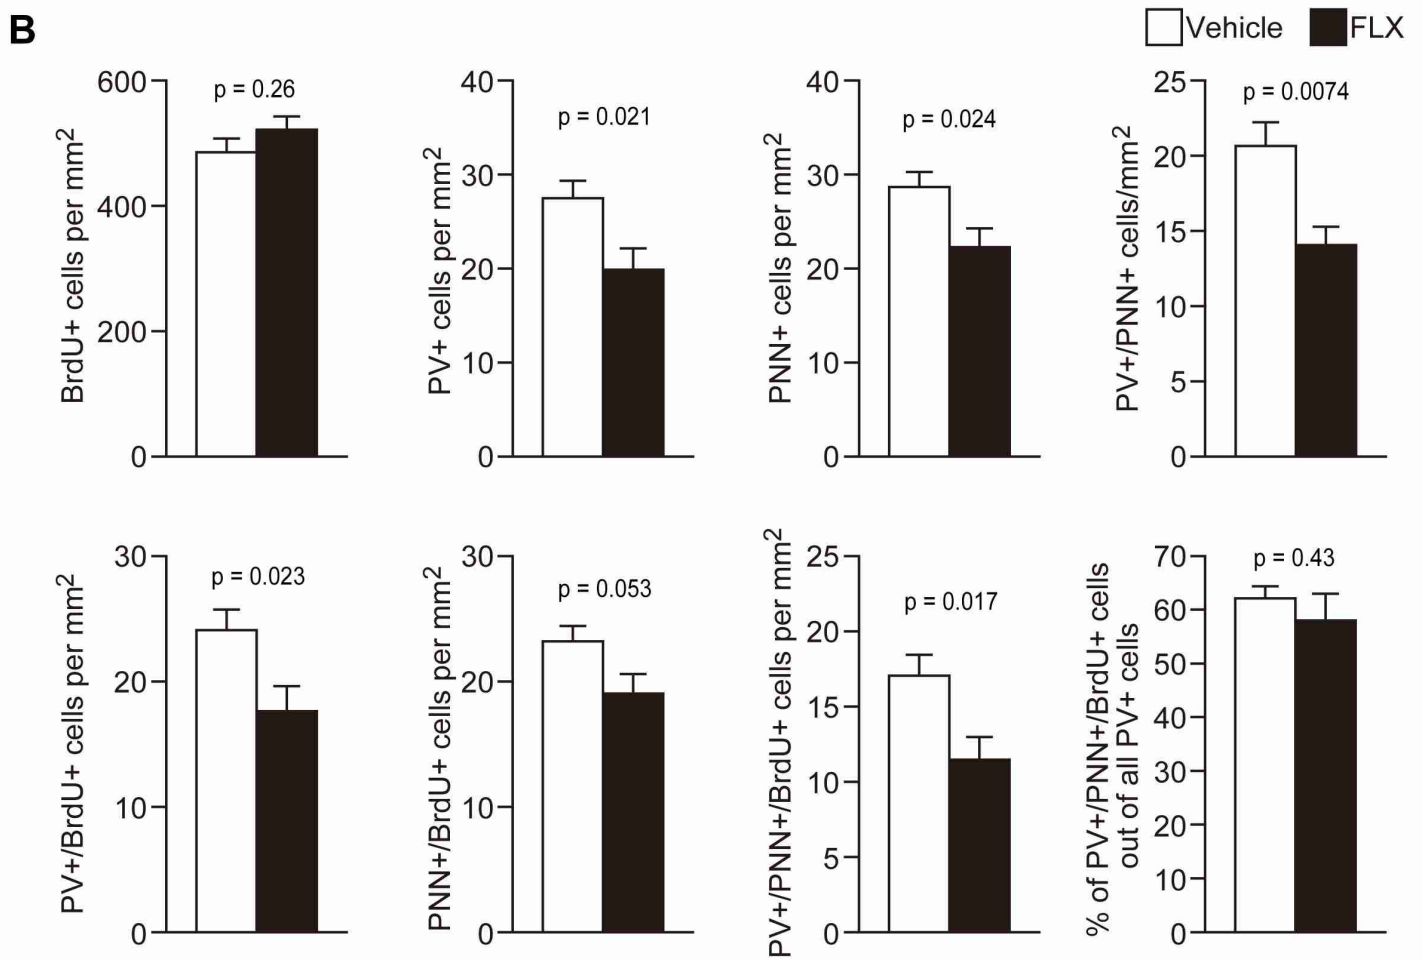

Figure S6

**Figure S6. No production of new parvalbumin+ cells with FLX treatments in the hippocampal CA3 region**

(A) Representative coronal images of BrdU- (magenta), parvalbumin- (cyan), and PNN-stained (green) structures in the hippocampal CA3 region. Mice received FLX for 3 weeks at 15 mg/kg/day. (B) Quantification of the number of indicated marker-positive cells (n = 4 mice each; 11-week-old). BrdU, 5-bromodeoxyuridine; CA, cornu ammonis; FLX, fluoxetine; PNN, perineuronal net; PV, parvalbumin.

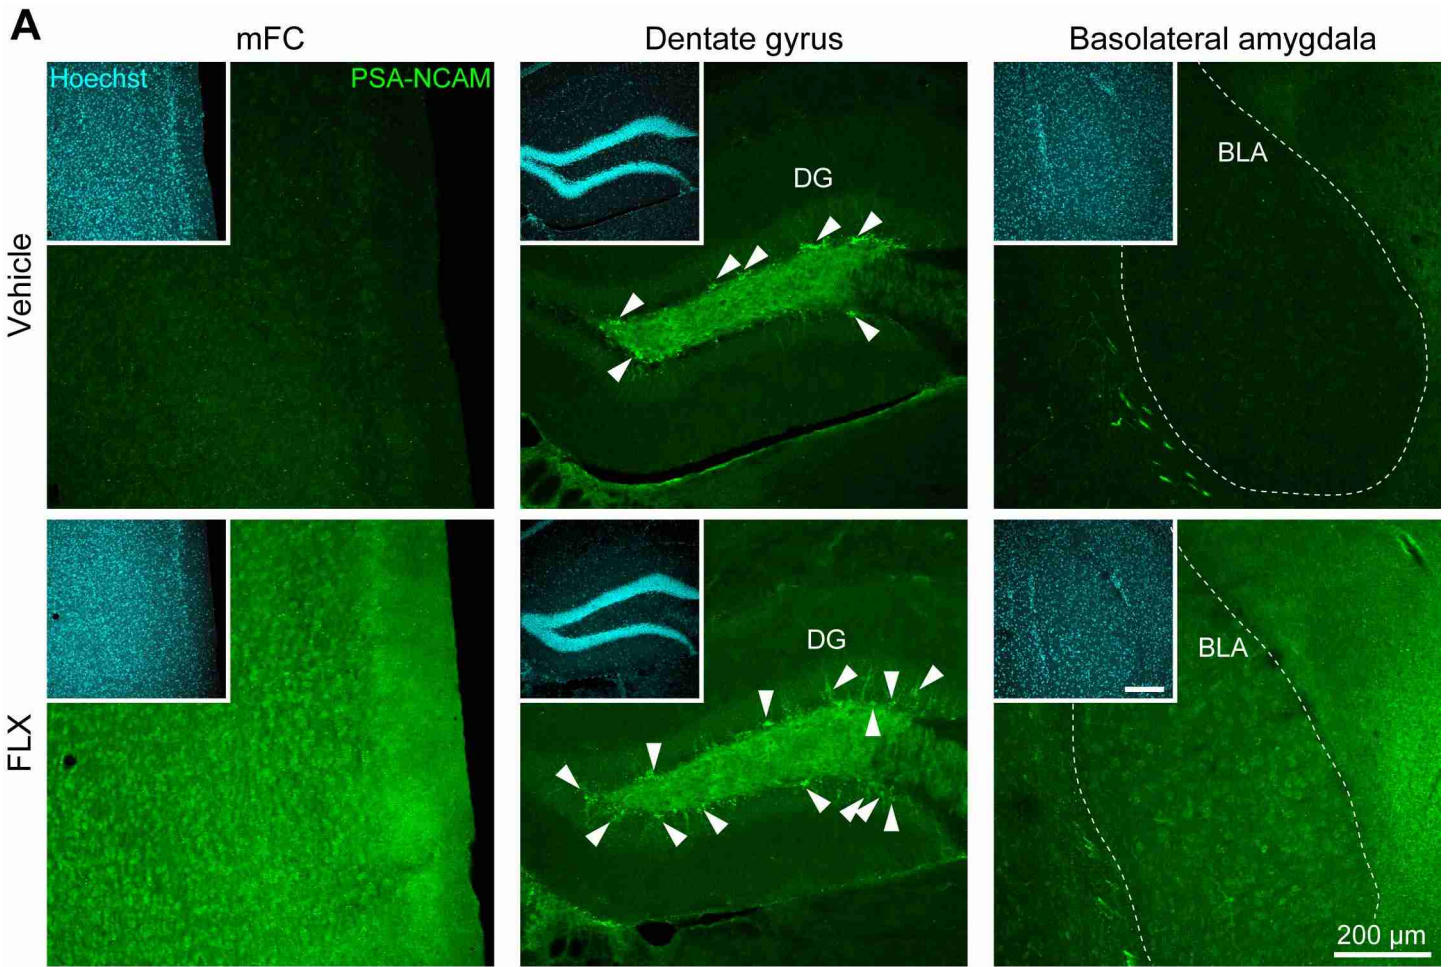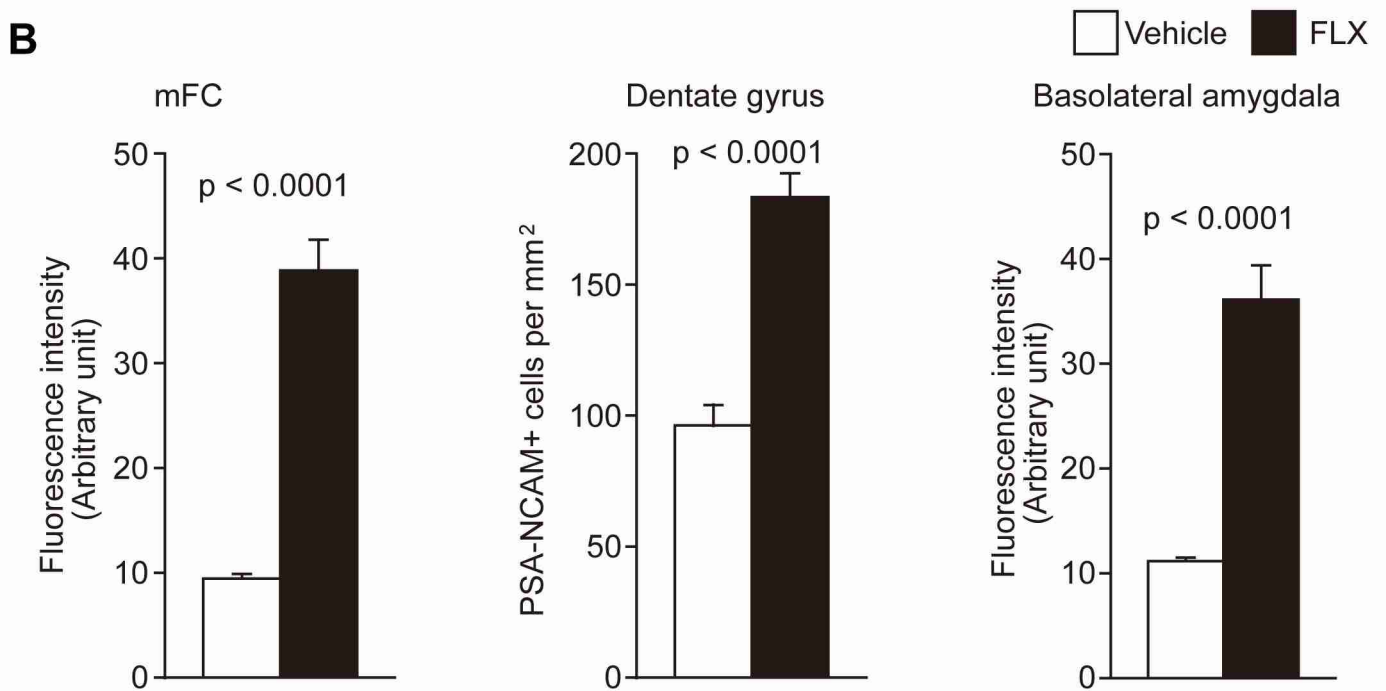

Figure S7

**Figure S7. Increased expression of PSA-NCAM in the mFC, DG, and basolateral amygdala**

**(A)** Representative coronal images of PSA-NCAM<sup>+</sup> structures (green) in the mFC, DG, and basolateral amygdala of mice treated with vehicle (upper row) or FLX (lower row). Mice received FLX for 3 weeks at 15 mg/kg/day. Arrowheads indicate PSA-NCAM<sup>+</sup> cells in the DG. Images of the same sections stained with Hoechst are shown in the insets. **(B)** Quantification of the fluorescence intensities of PSA-NCAM signals in the mFC and basolateral amygdala and the number of PSA-NCAM<sup>+</sup> cells in the DG of vehicle-treated and FLX-treated mice (n = 4 mice each; 11-week-old). BLA, basolateral amygdala; DG, dentate gyrus; FLX, fluoxetine; mFC, medial frontal cortex; PSA-NCAM, polysialic acid-neural cell adhesion molecule.

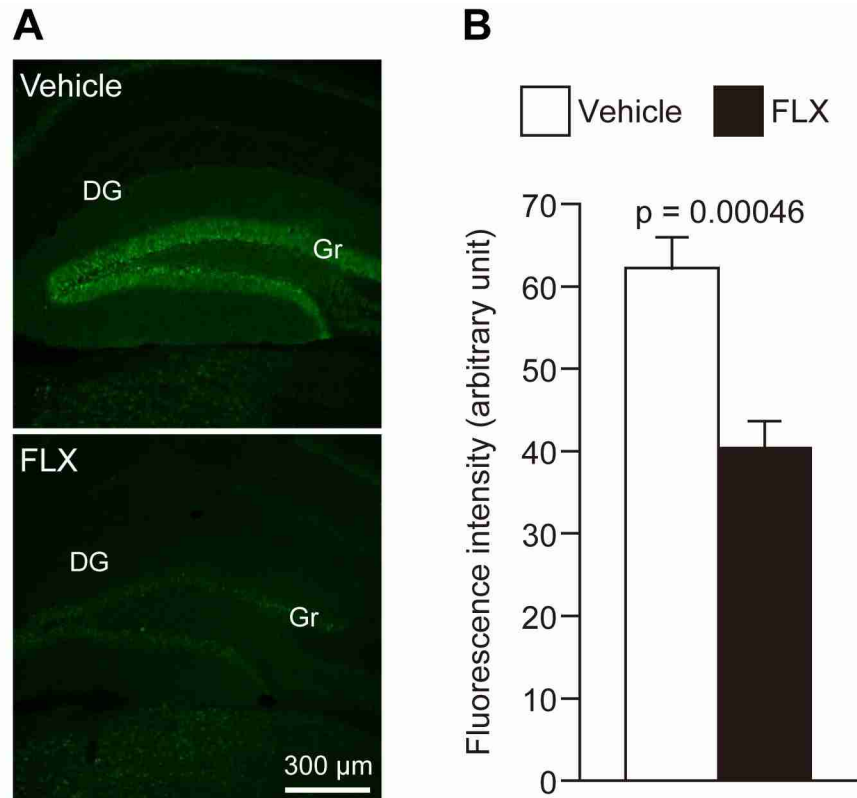

**Figure S8. Decreased expression of calbindin in the DG of FLX-treated mice**

(A) Representative coronal images for the expression of calbindin in the DG of vehicle- (upper) or FLX-treated mice (lower). Mice received FLX for 3 weeks at 15 mg/kg/day.

(B) Quantification of fluorescence intensity of calbindin in the granule cell layer of the DG in vehicle- or FLX-treated mice ( $n = 4$  mice each; 11-week-old). DG, dentate gyrus; FLX, fluoxetine; Gr, granule cell layer.



**Table S1. Density of PNN+ cells containing calretinin or somatostatin in the mFC, CA3, amygdala, and RTN**

| Region   | Marker | Treatment | Marker+ (cells/mm <sup>2</sup> )* <sup>1</sup> | PNN+ (cells/mm <sup>2</sup> ) | Double+ (cells/mm <sup>2</sup> )* <sup>2</sup> | Double+/total each marker+ (%) <sup>*3</sup> |
|----------|--------|-----------|------------------------------------------------|-------------------------------|------------------------------------------------|----------------------------------------------|
| mFC      | CR     | Vehicle   | 63 ± 2.8                                       | 57 ± 2.8                      | 0.38 ± 0.19                                    | 59 ± 0.31                                    |
|          |        | FLX       | 61 ± 3.0                                       | 58 ± 3.3                      | 0.35 ± 0.19                                    | 52 ± 0.29                                    |
|          | SOM    | Vehicle   | 47 ± 3.2                                       | 58 ± 3.0                      | 0.54 ± 0.26                                    | 1.0 ± 0.52                                   |
|          |        | FLX       | 43 ± 2.3                                       | 54 ± 3.1                      | 0.55 ± 0.29                                    | 1.2 ± 0.57                                   |
| CA3      | CR     | Vehicle   | 35 ± 1.8                                       | 37 ± 3.7                      | 6.6 ± 0.66                                     | 19 ± 2.0                                     |
|          |        | FLX       | 32 ± 1.9                                       | 38 ± 2.7                      | 5.9 ± 0.72                                     | 19 ± 3.3                                     |
|          | SOM    | Vehicle   | 26 ± 2.2                                       | 34 ± 1.9                      | 3.1 ± 1.1                                      | 11 ± 3.7                                     |
|          |        | FLX       | 26 ± 1.1                                       | 31 ± 1.6                      | 2.0 ± 0.57                                     | 7.3 ± 2.2                                    |
| Amygdala | CR     | Vehicle   | 72 ± 4.7                                       | 38 ± 2.9                      | 0.33 ± 0.33                                    | 0.46 ± 0.46                                  |
|          |        | FLX       | 65 ± 3.3                                       | 38 ± 2.2                      | 0.33 ± 0.33                                    | 0.56 ± 0.56                                  |
|          | SOM    | Vehicle   | 26 ± 1.9                                       | 31 ± 2.0                      | 0                                              | 0                                            |
|          |        | FLX       | 26 ± 1.4                                       | 28 ± 1.5                      | 0                                              | 0                                            |
| RTN      | CR     | Vehicle   | 0.93 ± 0.49                                    | 478 ± 17                      | 0                                              | 0                                            |
|          |        | FLX       | 1.0 ± 0.47                                     | 531 ± 26                      | 0                                              | 0                                            |
|          | SOM    | Vehicle   | 0.33 ± 0.33                                    | 517 ± 17                      | 0                                              | 0                                            |
|          |        | FLX       | 0.55 ± 0.37                                    | 465 ± 28                      | 0                                              | 0                                            |
|          | CB     | Vehicle   | 35 ± 5.6                                       | 488 ± 23                      | 34 ± 5.5                                       | 99 ± 0.97                                    |
|          |        | FLX       | 47 ± 7.3                                       | 514 ± 21                      | 46 ± 6.9                                       | 99 ± 0.71                                    |

CA, cornu ammonis; CB, calbindin; CR, calretinin; FLX, fluoxetine; mFC, medial frontal cortex; PNN, perineuronal net; RTN, reticular thalamic nucleus; SOM, somatostatin.

\*1: The numbers of marker-positive (+) cells (CR, SOM, or CB) are presented.

\*2: The numbers of marker and perineuronal net (PNN) double+ cells are presented.

\*3: The percentages of marker and PNN double+ cells out of all marker+ cells are presented.
